# 1 **A modification to the life cycle of the parasite**

## 2 ***Trypanosoma brucei***

3 Sarah Schuster<sup>#</sup>, Ines Subota<sup>#</sup>, Jaime Lisack, Henriette Zimmermann, Christian  
4 Reuter, Brooke Morriswood and Markus Engstler\*

5 \* these authors contributed equally

6 <sup>#</sup> corresponding author: [markus.engstler@biozentrum.uni-wuerzburg.de](mailto:markus.engstler@biozentrum.uni-wuerzburg.de)

7

## 8 **Abstract**

9 African trypanosomes cause sleeping sickness in humans and nagana in cattle. These  
10 unicellular parasites are transmitted by the blood-sucking tsetse fly<sup>1</sup>. In the mammalian  
11 host's circulation, tissues, and interstitium, at least two main life cycle stages exist:  
12 slender and stumpy bloodstream forms<sup>2,3,4,5,6</sup>. Proliferating slender forms differentiate  
13 into cell cycle-arrested stumpy forms at high levels of parasitaemia. This  
14 developmental stage transition occurs in response to the quorum sensing factor SIF  
15 (stumpy induction factor)<sup>7</sup>, and is thought to fulfil two main functions. First, it auto-  
16 regulates the parasite load in the host. Second, the stumpy stage is regarded as pre-  
17 adapted for tsetse fly infection and the only form capable of successful vector  
18 transmission<sup>8</sup>. Differentiation to the stumpy form is accompanied by fundamental  
19 morphological and metabolic changes, including expression of the stumpy marker,  
20 *protein associated with differentiation 1* (PAD1)<sup>9</sup>. Here, we show that proliferating  
21 slender stage trypanosomes are equally able to infect the tsetse fly, and that a single  
22 parasite is sufficient. The slender parasites complete the complex life cycle in the fly  
23 with comparable overall success rates and kinetics as stumpy forms. We further show  
24 that in the tsetse midgut, the slender parasites activate the canonical PAD1 pathway,  
25 without undergoing either cell cycle arrest or a morphological transition to the stumpy

26 form. Instead, with the onset of PAD1 expression, the parasites directly differentiate  
27 into the procyclic (insect) stage. Our findings not only propose a revision to the  
28 traditional view of the trypanosome life cycle, but also suggest a solution to a long-  
29 acknowledged paradox in the transmission event: parasitaemia in chronic infections is  
30 typically quite low, and so the probability of a tsetse ingesting a stumpy cell during a  
31 bloodmeal is also low<sup>10,11,12,13</sup>.

32

### 33 **Results and Discussion**

34 Slender and stumpy bloodstream form trypanosomes can be distinguished based on  
35 cell cycle, morphological, and metabolic criteria. The genome of the single  
36 mitochondrion (kinetoplast, K) and the cell nucleus (N) can be readily visualised using  
37 DNA stains, and their prescribed sequence of replication (1K1N, 2K1N, 2K2N) allows  
38 cell cycle stage to be inferred<sup>14</sup>. Slender cells are found in all three K/N ratios, while  
39 stumpy cells, which are cell cycle-arrested, are found only as 1K1N cells (Fig. 1A).  
40 Expression of *protein associated with differentiation 1* (PAD1) is accepted as a marker  
41 for development to the stumpy stage<sup>9</sup>. Cells expressing an NLS-GFP reporter fused  
42 to the 3' UTR of the PAD1 gene (GFP:PAD1<sub>UTR</sub>) will have GFP-positive nuclei when  
43 the PAD1 gene is active. Hence, slender cells are GFP-negative; stumpy cells are  
44 GFP-positive (Fig. 1A). We have previously shown that stumpy cells can be formed  
45 independently of high cell population density by ectopic expression of a second variant  
46 surface glycoprotein (VSG) isoform, a process that mimics one of the pathways  
47 involved in trypanosome antigenic variation<sup>15,16,17,18</sup>. These so-called expression site  
48 (ES)-attenuated stumpy cells can complete the developmental cycle in the tsetse fly<sup>18</sup>.  
49 It remained an open question whether this occurred with the same efficiency as with  
50 SIF-produced stumpy cells. To address this question, we quantitatively compared the

51 transmission efficiency of stumpy populations generated by either SIF-treatment or  
52 through ES-attenuation. Tsetse flies (*Glossina morsitans morsitans*) were infected  
53 during membrane feeding (Fig. 1B; Supplementary Video 1) with defined numbers of  
54 pleomorphic trypanosomes, which are capable of completing the entire developmental  
55 cycle. Two transgenic trypanosome cell lines, both of which contained the  
56 GFP:PAD1<sub>UTR</sub> reporter construct, were used. One was subjected to ectopic VSG  
57 expression to drive ES attenuation (line ES;<sup>18</sup>). The other was treated with stumpy  
58 induction factor (line SIF). Both treatments resulted in expression of the  
59 GFP:PAD1<sub>UTR</sub> reporter and synchronous differentiation to the stumpy stage. The  
60 resulting stumpy populations were fed to tsetse flies at concentrations ranging from  
61 120,000 to 10 cells/ml. A feeding tsetse typically ingests 20  $\mu$ l of blood<sup>19</sup>, meaning that  
62 between 2,400 and 0.2 trypanosomes were ingested per bloodmeal on average (Fig.  
63 1C, rows i-vi, column 2, Total). The trypanosomes had been previously scored for  
64 expression of the GFP:PAD1<sub>UTR</sub> reporter to confirm their identity as stumpy forms (Fig.  
65 1C, columns 3-4). To analyse the infections, we carried out microscopic analyses of  
66 dissected tsetse digestive tracts (Fig. 1D, E). The presence of mammal-infective,  
67 metacyclic trypanosomes in explanted tsetse salivary glands indicated completion of  
68 the tsetse transmission cycle (Fig. 1F). The uptake, on average, of two stumpy  
69 parasites of either cell line produced robust infections of tsetse midgut (MG),  
70 proventriculus (PV), and salivary glands (SG) (Fig. 1C, columns 5-7). Ingestion, on  
71 average, of even a single stumpy cell was sufficient to produce salivary gland  
72 infections in almost 5% of all tsetse (Fig. 1C, row v). When the stumpy parasite number  
73 was further reduced to 0.2 cells on average per bloodmeal, 0.9% of flies still acquired  
74 salivary gland infections (Fig. 1C, row vi). As a measure of the incidence of life cycle  
75 completion in the tsetse fly, we calculated the transmission index (TI; ratio of salivary

76 gland to midgut infections) for each condition<sup>20</sup>. We found that for flies infected with 2  
77 trypanosomes on average, the TI was comparable between SIF-induced (TI = 0.29)  
78 and ES-induced (TI = 0.31) stumpy trypanosomes (Fig. 1C, rows iii-iv). A similar TI of  
79 0.23 was observed in flies ingesting on average 1 trypanosome (Fig. 1C, row v). Thus,  
80 our data clearly show that a single stumpy cell is sufficient to infect a tsetse fly. As a  
81 control, infections were also carried out using a monomorphic trypanosome strain  
82 (Supplementary Table 1A). Monomorphic trypanosomes are able to infect the tsetse  
83 midgut, but are incapable of completing the developmental cycle in the fly<sup>21,22</sup>. As  
84 expected, no salivary gland infections were seen using these cells. Next, we did an  
85 experiment that was originally intended as an additional *negative* control: we infected  
86 tsetse flies with proliferating PAD1-negative slender trypanosomes from the two  
87 pleomorphic cell lines used (Fig. 1C, rows vii-xi). We expected these cells not to  
88 passage through the fly. Remarkably, however, there was almost no difference in the  
89 infection efficiency when the flies were fed with either 20 stumpy trypanosomes or 20  
90 pleomorphic slender trypanosomes (Fig. 1C, compare TI for rows ii and vii). When flies  
91 were fed with on average 2 slender parasites each, the TI was actually higher for  
92 slender cells (0.60) than for stumpy cells (0.31) (Fig. 1C, compare TI for rows viii and  
93 iii). This TI of 0.60 was identical for both populations of slender cells (Fig. 1C, rows viii-  
94 ix). Next, when given on average just one PAD1-negative slender cell per bloodmeal,  
95 parasite infections still made it through the midgut, proventriculus, and salivary glands  
96 with incidences of 4.9%, 4.3%, and 2.1% respectively, at a TI of 0.44 (Fig. 1C, row x).  
97 In order to be absolutely sure that slender trypanosomes can passage through the  
98 tsetse, we repeated the experiment with naïve slender parasites that had been freshly  
99 differentiated from insect-derived metacyclic trypanosomes, i.e. cells that had just  
100 restarted the mammalian stage life cycle (Supplementary Table 1, row iii). Infections

101 with on average two freshly-differentiated slender trypanosomes per bloodmeal  
102 revealed 6.9% midgut and 2.5% salivary gland infections. The transmission index was  
103 0.36.

104 It is important to note however that while ES-attenuated cells showed similar midgut,  
105 proventriculus, and salivary gland infection incidence as either stumpy or slender  
106 forms (Fig. 1C, rows ii-iii and vii-viii), the SIF-induced stumpy cells were better at  
107 establishing infections than their slender counterparts (Fig. 1C, rows iv-vi and ix-xi).  
108 Infections with 1-2 slender cells, however, produced higher TI values than those with  
109 the same numbers of stumpy cells (Fig. 1G). This suggests that the proliferative  
110 slender cells are more capable of progressing from a midgut infection to a salivary  
111 gland one, and thus have at least comparable developmental competence to the  
112 stumpy forms. In summary, our experiments not only establish that single  
113 trypanosomes (either slender or stumpy) can infect the tsetse fly, but also strongly  
114 suggest that slender cells can efficiently complete the passage through the tsetse fly.  
115 To determine how slender trypanosomes manage to establish infections, we observed  
116 the early events following trypanosome ingestion by tsetse flies (Supplementary Video  
117 2). The canonical version of events is that ingested stumpy (i.e. PAD1-positive) cells  
118 reactivate the cell cycle, begin to express the EP procyclin protein on their cell surface,  
119 and differentiate to the procyclic life cycle stage. We infected tsetse with pleomorphic  
120 trypanosomes, which not only contained the stumpy-specific GFP:PAD1<sub>UTR</sub> marker,  
121 but also encoded an EP1:YFP fusion<sup>23</sup>. In this way, the onset of stumpy development  
122 was observable as GFP fluorescence in the nucleus, and further differentiation to the  
123 procyclic life cycle stage as YFP fluorescence on the parasite cell surface. In addition,  
124 the cell cycle status (K/N counts, see Fig. 1A), morphology, and the characteristic  
125 motile behaviour of the trypanosomes were also assessed as criteria of developmental

126 progress. In total, 114 tsetse flies (57 male and 57 female) were dissected after at  
127 least six independent infections with either 12,000 slender or stumpy parasites each  
128 (Fig. 2). These high initial parasite numbers allowed the microscopic analysis of  
129 individual living slender ( $n = 1845$ ) and stumpy trypanosomes ( $n = 1237$ ) within the  
130 convoluted microenvironment of midgut explants<sup>24</sup>. As early as 2-4 h post-infection  
131 with slender trypanosomes, a few (0.8%) dividing trypanosomes with a nuclear PAD1  
132 signal could be observed (Fig. 2A). After 8-10 hours however, half (50.4%) of all  
133 trypanosomes in the explants were PAD1-positive. After 24 hours, 84.3% of the  
134 parasites expressed PAD1, and 9.8% had already initiated developmental progression  
135 to the procyclic insect stage, as evidenced by EP1:YFP fluorescence on their cell  
136 surface. At 48-50 h post-infection with slender trypanosomes, virtually the entire  
137 trypanosome population (91.8%) expressed PAD1, and almost one fifth (19.1%) was  
138 EP1-positive. To examine cell cycle progression, we counted the number of 1K1N,  
139 2K1N, and 2K2N cells in the PAD1-positive and PAD1-negative slender cell  
140 populations (Fig. 2B, slender). Remarkably, 8-10 h post-infection, replicating (i.e.  
141 2K1N, 2K2N) cells that were PAD1-positive could be readily observed. Over the  
142 duration of the experiment, PAD1-negative cells gradually decreased in numbers,  
143 while PAD1-positive slender cells at all cell cycle stages were increasingly observed  
144 (Supplementary Video 2C). Thus, the PAD1 pathway is triggered in the fly, but  
145 apparently without pushing the slender parasites towards cell cycle arrest. Of note,  
146 EP1 expression did not exactly correlate with acquisition of procyclic morphology. At  
147 24-26h, only 9.8% of slender cells are EP1-positive (Fig. 2A), but the EP1-negative  
148 cells frequently exhibited procyclic morphology (Fig. 2C, upper panels). An example  
149 of a dividing (2K2N), PAD1-positive, EP1-positive cell is also shown (Fig. 2C, lower  
150 panels; Supplementary Video 2D). Thus, it appears that a seamless developmental

151 stage transition from slender bloodstream forms to the procyclic insect forms takes  
152 place, which is accompanied by the typical reorganisation of the cytoskeleton and the  
153 concomitant switch of swimming styles<sup>25,24</sup>.

154 In order to directly compare the kinetics of slender-to-procyclic development with that  
155 of stumpy stage trypanosomes, we fed flies with SIF-induced, PAD1-positive stumpy  
156 trypanosomes (Fig. 2B, stumpy). These cells remained in cell cycle arrest for the first  
157 day, and re-entered the cell cycle as procyclic parasites after day 2-3. Stumpy  
158 trypanosomes showed a higher incidence of EP1:YFP expression than slender cells  
159 at all timepoints (Fig. 2A, grey bars). The procyclic marker EP1:YFP was already  
160 visible on the cell surface of 16.2 % of trypanosomes after 10 hours, showing that EP  
161 expression was initiated before release of cell cycle arrest. Uncoupling of EP surface  
162 expression from the commitment to differentiation has been reported before<sup>23</sup>.

163 We further investigated the developmental potential of pleomorphic slender  
164 bloodstream forms *in vitro* using the same cell lines and analysis as above.  
165 Differentiation to the procyclic insect stage was induced by the addition of *cis*-aconitate  
166 and a temperature drop from 37°C to 27°C<sup>26,27,28,23</sup> (Fig. 3). Slender trypanosomes  
167 activated the PAD1 pathway immediately, with 9.8% of all parasites being PAD1-  
168 positive within 2-4 hours, and 83.2% after 10 hours. PAD1 expression peaked after  
169 one day (98.3%), and declined thereafter (Fig. 3A). Simultaneously with PAD1 reporter  
170 expression, EP1 appeared on the cell surface of 19.6% of all parasites within 8-10  
171 hours, increasing to 98.3% after 3 days (Fig. 3A). Throughout the timecourse, PAD1-  
172 positive 2K1N and 2K2N cells were consistently observed, demonstrating that the  
173 PAD1-positive slender parasites did not arrest in the cell cycle, and continued dividing  
174 throughout *in vitro* differentiation to the procyclic stage (Fig. 3B). After 3 days of *cis*-

175 aconitate treatment *in vitro*, slender trypanosomes had established a proliferating  
176 procyclic parasite population.

177 By comparison, stumpy parasites (Fig. 3A, grey bars) responded to *in vitro cis*-  
178 aconitate treatment with rapid expression of the EP1:YFP marker, with 28.6% of all  
179 cells being positive within 2-4 hours. After one day, EP1 was present on almost all  
180 (96.7%) stumpy trypanosomes. The cell cycle analysis revealed that the parasites  
181 were not dividing, however (Fig. 3B). The first cells re-entered the cell cycle only after  
182 15-17 hours, and a normal procyclic cell cycle profile was not reached until 3 days.  
183 Thus, the *in vitro* differentiation supported the *in vivo* observations, demonstrating that  
184 pleomorphic slender trypanosomes are able to directly differentiate to the procyclic  
185 stage without becoming cell cycle-arrested stumpy cells. Furthermore, the overall  
186 developmental capacity and differentiation kinetics of both life cycle stages are  
187 comparable, *in vitro* and *in vivo*.

188 In conclusion, our observations suggest a revised view on the life cycle of African  
189 trypanosomes (Fig. 4). One trypanosome suffices to produce robust infections of the  
190 vector, and the stumpy stage is not essential for tsetse transmission. Slender parasites  
191 can complete the complex life cycle in the fly with comparable overall success rates  
192 and kinetics as the stumpy forms. The stumpy stage appears more able to establish  
193 initial infections in the fly midgut, however (Fig. 1C, column 5, MG). This may be  
194 related to a greater resistance against the digestive environment in the fly's gut, as  
195 has been discussed<sup>29,30</sup>. On the other hand, stumpy trypanosomes are not replicative,  
196 and their lifetime is limited to roughly 3 days<sup>31</sup>. In the fly, re-entry into the cell cycle is  
197 by no means immediate, but takes at least two days. Thus, stumpy cells may run into  
198 an age-related problem. Conversely, slender-derived parasites appear to travel more  
199 efficiently to their final destination within the tsetse, the salivary glands. The



200 significantly higher mobility of slender forms when compared to stumpy  
201 trypanosomes<sup>32</sup>, and the seamless differentiation to the motile procyclic stage could  
202 be involved in this migratory success. Along similar lines, it is worth noting that  
203 *Trypanosoma congolense*, the principal causative agent of the cattle plague nagana,  
204 infects tsetse flies without manifesting a cell cycle-arrested stumpy life cycle stage<sup>33</sup>.  
205 This raises the question of what the true biological function of the stumpy life cycle  
206 stage actually is.

207

## 208 **Methods**

### 209 **Trypanosome culture**

210 Pleomorphic *Trypanosoma brucei brucei* strain EATRO 1125 (serodome AnTat1.1)<sup>34</sup>  
211 bloodstream forms were grown in HMI-9 medium<sup>35</sup>, supplemented with 10% (v/v) fetal  
212 bovine serum and 1.1% (w/v) methylcellulose (Sigma 94378)<sup>36</sup> at 37°C and 5% CO<sub>2</sub>.  
213 Slender stage parasites were maintained at a maximum cell density of 5x10<sup>5</sup> cells/ml.  
214 For cell density-triggered differentiation to the stumpy stage, cultures seeded at 5x10<sup>5</sup>  
215 cells/ml were cultivated for 48 hours without dilution. Pleomorphic parasites were  
216 harvested from the viscous medium by 1:4 dilution with trypanosome dilution buffer  
217 (TDB; 5 mM KCl, 80 mM NaCl, 1 mM MgSO<sub>4</sub>, 20 mM Na<sub>2</sub>HPO<sub>4</sub>, 2 mM NaH<sub>2</sub>PO<sub>4</sub>, 20  
218 mM glucose, pH 7.6), followed by filtration (MN 615 ¼, Macherey-Nagel, Germany)  
219 and centrifugation (1,400xg, 10 min, 37°C)<sup>18</sup>. Monomorphic *T. brucei* 427 MITat 1.2  
220 13-90 bloodstream forms<sup>37</sup> were grown in HMI-9 medium<sup>35</sup>, supplemented with 10%  
221 (v/v) fetal bovine serum at 37°C and 5% CO<sub>2</sub>.  
222 For *in vitro* differentiation to the procyclic insect stage, bloodstream stage  
223 trypanosomes were pooled to a cell density of 2x10<sup>6</sup> cells/ml in DTM medium  
224 immediately before use<sup>38</sup>. *Cis*-aconitate was added to a final concentration of 6

225 mM<sup>26,38</sup> and temperature was adjusted to 27°C. Procyclic parasites were grown in  
226 SDM79 medium<sup>39</sup>, supplemented with 10% (v/v) fetal bovine serum<sup>35</sup> and 20 mM  
227 glycerol<sup>40,24</sup>.

## 228 **Genetic manipulation of trypanosomes**

229 Transfection of pleomorphic trypanosomes was done as previously described<sup>18</sup>, using  
230 an AMAXA Nucleofector II (Lonza, Switzerland). Transgenic trypanosome clones were  
231 selected by limiting dilution in the presence of the appropriate antibiotic. The  
232 GFP:PAD1<sub>UTR</sub> reporter construct<sup>18</sup> was used to transfect AnTat1.1 trypanosomes to  
233 yield the cell line 'SIF'. The trypanosome 'ES' line was described previously<sup>18</sup>. It  
234 contains the reporter GFP:PAD1<sub>UTR</sub> construct and an ectopic copy of VSG gene MITat  
235 1.6 under the control of a tetracycline-inducible T7-expression system. The EP1:YFP  
236 construct was integrated into the EP1-procyclic locus as described previously<sup>23</sup>.

## 237 **Tsetse maintenance**

238 The tsetse fly colony (*Glossina morsitans morsitans*) was maintained at 27°C and 70%  
239 humidity. Flies were kept in Roubaud cages and fed 3-times a week through a silicon  
240 membrane, with pre-warmed, defibrinated, sterile sheep blood (Acila, Germany).

## 241 **Fly infection and dissection**

242 Teneral flies were infected 1-3 days post-eclosion during their first meal. Depending  
243 on the experiment, trypanosomes were diluted in either TDB or sheep blood. The  
244 infective meals were supplemented with 60 mM N-acetylglucosamine<sup>41</sup>. For infection  
245 with monomorphic parasites, cells were additionally treated for 48 hours with 12.5 mM  
246 glutathione (GSH)<sup>42</sup> and 100 μM 8-pCPT-cAMP (cAMP)<sup>7</sup>.

247 Tsetse infection status was analysed between 35 and 40 days post-infection. Flies  
248 were euthanized with chloroform and dissected in PBS. Intact tsetse alimentary tracts  
249 were explanted and analysed microscopically, as described previously (Schuster,

250 2017). For the analysis of early trypanosome differentiation *in vivo*, slender or stumpy  
251 trypanosomes at a concentration of  $6 \times 10^5$  cells/ml were resuspended in TDB to the  
252 required final concentration and fed to flies. The numbers of flies used and the number  
253 of independent experiments carried out are indicated in the figure legends. Results  
254 are presented as sample means.

### 255 **Fluorescence microscopy and video acquisition**

256 Live trypanosome imaging was performed with a fully automated DMI6000B wide field  
257 fluorescence microscope (Leica microsystems, Germany), equipped with a  
258 DFC365FX camera (pixel size  $6.45 \mu\text{m}$ ) and a 100x oil objective (NA 1.4). For  
259 high-speed imaging, the microscope was additionally equipped with a pco.edge  
260 sCMOS camera (PCO, Germany; pixel size  $6.5 \mu\text{m}$ ). Fluorescence video acquisition  
261 was performed at frame rates of 250 fps. For visualisation of parasite cell cycle and  
262 morphology, slender and stumpy trypanosomes were harvested and incubated with 1  
263 mM AMCA-sulfo-NHS (Thermo Fisher Scientific, Germany) for 10 minutes on ice.  
264 Cells were chemically fixed in 4% (w/v) formaldehyde and 0.05% (v/v) glutaraldehyde  
265 overnight at  $4^\circ\text{C}$ . DNA was visualised with  $1 \mu\text{g/ml}$  DAPI immediately before analysis.  
266 3D-Imaging was done with a fully automated iMIC wide field fluorescence microscope  
267 (FEI-TILL Photonics, Germany), equipped with a Sensicam qe CCD camera (PCO,  
268 Germany; pixel size  $6.45 \mu\text{m}$ ) and a 100x oil objective (NA 1.4). Deconvolution of  
269 image stacks was performed with the Huygens Essential software (Scientific Volume  
270 Imaging B.V., Netherlands). Fluorescence images are shown as maximum intensity  
271 projections of 3D-stacks in false colours with green fluorescence in green and blue  
272 fluorescence in grey.

### 273 **Scanning electron microscopy**

274 Explanted tsetse alimentary tracts were fixed in Karnovsky solution (2% formaldehyde,  
275 2.5% glutaraldehyde in 0.1M cacodylate buffer, pH 7.4) and incubated overnight at  
276 4°C. Samples were washed 3-times for 5 minutes at 4°C with 0.1M cacodylate buffer,  
277 pH 7.4, followed by incubation for 1 hour at 4°C in post-fixation solution (2.5%  
278 glutaraldehyde in 0.1M cacodylate buffer, pH 7.4). After additional washing, the  
279 samples were incubated for 1 hour at 4°C in 2% tannic acid in cacodylate buffer, pH  
280 7.4, 4.2% sucrose, and washed again in water (3x for 5 minutes, 4°C). Finally, serial  
281 dehydration in acetone was performed, followed by critical point drying and platinum  
282 coating. Scanning electron microscopy was done using the JEOL JSM-7500F field  
283 emission scanning electron microscope.

284

## 285 **Data Availability**

286 All datasets generated during this project are provided as online source data. The cell  
287 lines used are available from the corresponding author on request.

288

## 289 **Acknowledgements**

290 We thank Nicola Jones, Susanne Kramer, Manfred Alsheimer, Christian Janzen and  
291 Ricardo Benavente for discussion and critical reading of the manuscript. ME is  
292 supported by DFG grants EN305, SPP1726 (Microswimmers – From Single Particle  
293 Motion to Collective Behaviour), and GRK2157 (3D Tissue Models to Study Microbial  
294 Infections by Obligate Human Pathogens). ME is member of the Wilhelm Conrad  
295 Roentgen Center for Complex Material Systems (RCCM).

296

297

298

299

## 300 **Author contributions**

301 S.S. designed the experiments, performed the experiments, analysed the data,  
302 interpreted the results and wrote the manuscript. I.S. designed the experiments,  
303 performed the experiments, analysed the data and interpreted the results. J.L.  
304 designed the experiments, performed the experiments, analysed the data, interpreted  
305 the results and wrote the manuscript. H.Z., designed the experiments, performed the  
306 experiments, analysed the data and interpreted the results. C.R. designed the  
307 experiments, performed the experiments, analysed the data and interpreted the  
308 results. B.M. interpreted the results and wrote the manuscript. M.E. conceived the  
309 study, designed the experiments, analysed the data, interpreted the results and wrote  
310 the manuscript.

311

## 312 **Competing interests**

313 The authors declare no competing interests.

314

## 315 **References**

- 316 1. Bruce, D. Preliminary Report on Tsetse Fly Disease or Nagana in Zululand,  
317 Bennet & Davis, Durban (1895).
- 318 2. Robertson, M. Notes on the Polymorphism of *Trypanosoma gambiense* in the  
319 Blood and Its Relation to the Exogenous Cycle in *Glossina palpalis*.  
320 *Proceedings of the Royal Society B: Biological Sciences* **85**, 527–539 (1912).
- 321 3. Goodwin, L. G. The pathology of African Trypanosomiasis. *Trans R Soc Trop*  
322 *Med Hyg* **64**, 797–812 (1970).

- 323 4. Trindade, S. *et al.* *Trypanosoma brucei* Parasites Occupy and Functionally  
324 Adapt to the Adipose Tissue in Mice. *Cell Host & Microbe* **19**, 837–848 (2016).
- 325 5. Capewell, P. *et al.* The skin is a significant but overlooked anatomical reservoir  
326 for vector-borne African trypanosomes. *eLife* **5**, e17716 (2016).
- 327 6. Krüger, T., Schuster, S. & Engstler, M. Beyond Blood: African Trypanosomes  
328 on the Move. *Trends in Parasitology* **34**, 1056–1067 (2018).
- 329 7. Vassella, E., Reuner, B., Yutzy, B. & Boshart, M. Differentiation of African  
330 trypanosomes is controlled by a density sensing mechanism which signals cell  
331 cycle arrest via the cAMP pathway. *J. Cell. Sci.* **110**, 2661–2671 (1997).
- 332 8. Rico, E. *et al.* Bloodstream form pre-adaptation to the tsetse fly in *Trypanosoma*  
333 *brucei*. *Front. Cell. Infect. Microbiol.* **3:78** (2013).
- 334 9. Dean, S., Marchetti, R., Kirk, K. & Matthews, K. R. A surface transporter family  
335 conveys the trypanosome differentiation signal. *Nature* **459**, 213–217 (2009).
- 336 10. Koch, R., Beck, M., Kleine, F. K. *Bericht über die Tätigkeit der zur Erforschung*  
337 *der Schlafkrankheit im Jahre 1906/07 nach Ostafrika entsandten Kommission.*  
338 *Arbeiten aus dem Kaiserlichen Gesundheitsamt, Band 31.* Berlin : J. Springer  
339 (1909).
- 340 11. Frezil, J. L. Application of xenodiagnosis in the detection of *T. gambiense*  
341 trypanosomiasis in immunologically suspect patients. *Bull Soc Pathol Exot*  
342 *Filiales* **64**, 871–878 (1971).
- 343 12. Wombou Toukam, C. M., Solano, P., Bengaly, Z., Jamonneau, V. & Bucheton,  
344 B. Experimental evaluation of xenodiagnosis to detect trypanosomes at low  
345 parasitaemia levels in infected hosts. *Parasite* **18**, 295–302 (2011).
- 346 13. Capewell, P. *et al.* Resolving the apparent transmission paradox of African  
347 sleeping sickness. *PLOS Biology* **17**, e3000105 (2019).

- 348 14. Sherwin, T. & Gull, K. The cell division cycle of *Trypanosoma brucei brucei*:  
349 timing of event markers and cytoskeletal modulations. *Philos. Trans. R. Soc.*  
350 *Lond., B, Biol. Sci.* **323**, 573–588 (1989).
- 351 15. Cross, G. A. Identification, purification and properties of clone-specific  
352 glycoprotein antigens constituting the surface coat of *Trypanosoma brucei*.  
353 *Parasitology* **71**, 393–417 (1975).
- 354 16. Hertz-Fowler, C. *et al.* Telomeric Expression Sites Are Highly Conserved in  
355 *Trypanosoma brucei*. *PLoS ONE* **3**, e3527 (2008).
- 356 17. Batram, C., Jones, N. G., Janzen, C. J., Markert, S. M. & Engstler, M.  
357 Expression site attenuation mechanistically links antigenic variation and  
358 development in *Trypanosoma brucei*. *Elife* **3**, e02324 (2014).
- 359 18. Zimmermann, H. *et al.* A quorum sensing-independent path to stumpy  
360 development in *Trypanosoma brucei*. *PLOS Pathogens* **13**, e1006324 (2017).
- 361 19. Gibson, W. & Bailey, M. The development of *Trypanosoma brucei* within the  
362 tsetse fly midgut observed using green fluorescent trypanosomes. *Kinetoplastid*  
363 *Biol Dis* **2**, 1 (2003).
- 364 20. Peacock, L., Ferris, V., Bailey, M. & Gibson, W. The influence of sex and fly  
365 species on the development of trypanosomes in tsetse flies. *PLoS Negl Trop*  
366 *Dis* **6**, e1515 (2012).
- 367 21. Herder, S. *et al.* *Trypanosoma brucei* 29-13 strain is inducible in but not  
368 permissive for the tsetse fly vector. *Exp. Parasitol.* **117**, 111–114 (2007).
- 369 22. Peacock, L., Ferris, V., Bailey, M. & Gibson, W. Fly transmission and mating  
370 of *Trypanosoma brucei brucei* strain 427. *Mol. Biochem. Parasitol.* **160**, 100–  
371 106 (2008).

- 372 23. Engstler, M. & Boshart, M. Cold shock and regulation of surface protein  
373 trafficking convey sensitization to inducers of stage differentiation in  
374 *Trypanosoma brucei*. *Genes Dev* **18**, 2798–2811 (2004).
- 375 24. Schuster, S. *et al.* Developmental adaptations of trypanosome motility to the  
376 tsetse fly host environments unravel a multifaceted *in vivo* microswimmer  
377 system. *eLife* **6**, e27656 (2017).
- 378 25. Heddergott, N. *et al.* Trypanosome Motion Represents an Adaptation to the  
379 Crowded Environment of the Vertebrate Bloodstream. *PLoS Pathogens* **8**,  
380 e1003023 (2012).
- 381 26. Brun, R., Jenni, L., Schönenberger, M. & Schell, K. F. *In vitro* cultivation of  
382 bloodstream forms of *Trypanosoma brucei*, *T. rhodesiense*, and *T. gambiense*.  
383 *J. Protozool.* **28**, 470–479 (1981).
- 384 27. Czichos, J., Nonnengaesser, C. & Overath, P. *Trypanosoma brucei*: cis-  
385 Aconitate and temperature reduction as triggers of synchronous transformation  
386 of bloodstream to procyclic trypomastigotes *in vitro*. *Experimental Parasitology*  
387 **62**, 283–291 (1986).
- 388 28. Ziegelbauer, K., Quinten, M., Schwarz, H., Pearson, T. W. & Overath, P.  
389 Synchronous differentiation of *Trypanosoma brucei* from bloodstream to  
390 procyclic forms *in vitro*. *Eur. J. Biochem.* **192**, 373–378 (1990).
- 391 29. Nolan, D. P., Rolin, S., Rodriguez, J. R., Van Den Abbeele, J. & Pays, E.  
392 Slender and stumpy bloodstream forms of *Trypanosoma brucei* display a  
393 differential response to extracellular acidic and proteolytic stress. *Eur. J.*  
394 *Biochem.* **267**, 18–27 (2000).



- 395 30. Matetovici, I., De Vooght, L. & Van Den Abbeele, J. Innate immunity in the  
396 tsetse fly (*Glossina*), vector of African trypanosomes. *Dev. Comp. Immunol.* **98**,  
397 181–188 (2019).
- 398 31. Turner, C. M., Aslam, N. & Dye, C. Replication, differentiation, growth and the  
399 virulence of *Trypanosoma brucei* infections. *Parasitology* **111**, 289–300 (1995).
- 400 32. Bargul, J. L. *et al.* Species-Specific Adaptations of Trypanosome Morphology  
401 and Motility to the Mammalian Host. *PLoS Pathogens* **12**, e1005448 (2016).
- 402 33. Rotureau, B. & Van Den Abbeele, J. Through the dark continent: African  
403 trypanosome development in the tsetse fly. *Front Cell Infect Microbiol* **3**, 53  
404 (2013).
- 405 34. Le Ray, D., Barry, J. D., Easton, C. & Vickerman, K. First tsetse fly transmission  
406 of the ‘AnTat’ serodeme of *Trypanosoma brucei*. *Ann Soc Belg Med Trop* **57**,  
407 369–381 (1977).
- 408 35. Hirumi, H. & Hirumi, K. Continuous cultivation of *Trypanosoma brucei* blood  
409 stream forms in a medium containing a low concentration of serum protein  
410 without feeder cell layers. *J. Parasitol.* **75**, 985–989 (1989).
- 411 36. Vassella, E. *et al.* Deletion of a novel protein kinase with PX and FYVE-related  
412 domains increases the rate of differentiation of *Trypanosoma brucei*. *Mol.*  
413 *Microbiol.* **41**, 33–46 (2001).
- 414 37. Wirtz, E., Leal, S., Ochatt, C. & Cross, G. A. A tightly regulated inducible  
415 expression system for conditional gene knock-outs and dominant-negative  
416 genetics in *Trypanosoma brucei*. *Mol. Biochem. Parasitol.* **99**, 89–101 (1999).
- 417 38. Overath, P., Czichos, J. & Haas, C. The effect of citrate/*cis*-aconitate on  
418 oxidative metabolism during transformation of *Trypanosoma brucei*. *Eur. J.*  
419 *Biochem.* **160**, 175–182 (1986).

- 420 39. Brun, R. & Schönenberger, M. Cultivation and *in vitro* cloning or procyclic  
421 culture forms of *Trypanosoma brucei* in a semi-defined medium. *Acta Trop.* **36**,  
422 289–292 (1979).
- 423 40. Vassella, E. *et al.* A major surface glycoprotein of *Trypanosoma brucei* is  
424 expressed transiently during development and can be regulated post-  
425 transcriptionally by glycerol or hypoxia. *Genes Dev.* **14**, 615–626 (2000).
- 426 41. Peacock, L., Ferris, V., Bailey, M. & Gibson, W. Multiple effects of the lectin-  
427 inhibitory sugars D-glucosamine and N-acetyl-glucosamine on tsetse-  
428 trypanosome interactions. *Parasitology* **132**, 651–658 (2006).
- 429 42. MacLeod, E. T., Maudlin, I., Darby, A. C. & Welburn, S. C. Antioxidants  
430 promote establishment of trypanosome infections in tsetse. *Parasitology* **134**,  
431 827–831 (2007).

# Figure 1

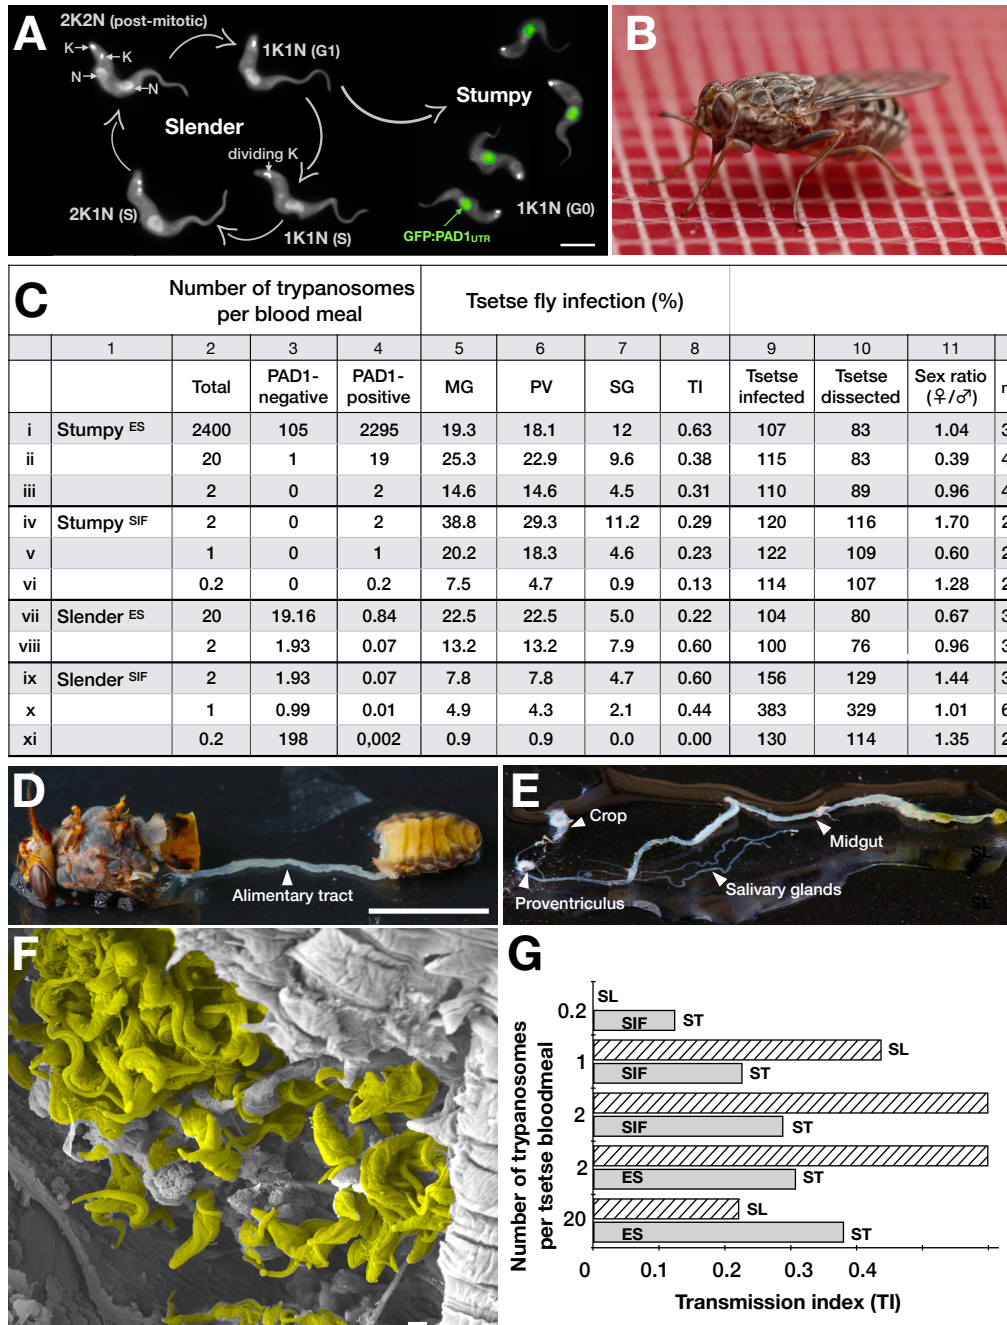

## Legend to Figure 1

Slender trypanosomes can complete the entire life cycle in the tsetse fly vector.

(A) Cell cycle (G1/S/post-mitotic), morphology, and differentiation of bloodstream form (mammalian-infective stage) trypanosomes. Proliferation of slender trypanosomes is detectable by duplication and segregation of the mitochondrial genome (kinetoplast, K) and nuclear DNA (N) over time. Quorum sensing causes cell cycle arrest (G0) and expression of the stumpy marker PAD1. Images are false-coloured, maximum intensity projections of deconvolved 3D stacks. The green colour indicates the nuclear GFP:PAD1<sub>UTR</sub> fluorescence, while the DAPI-stained kinetoplast and nucleus, and the AMCA-sulfo-NHS-labelled parasite cell surface, are shown in grey. Scale bar: 5  $\mu$ m.

(B) Trypanosome infections of tsetse flies were achieved via bloodmeal, which consists typically of 20  $\mu$ l, through a silicon membrane. The corresponding video is available in the Supplementary information (Supplementary Video 1).

(C) Slender trypanosomes can complete the entire tsetse infection cycle, and a single parasite is sufficient for tsetse passage. The flies were infected with either stumpy or slender trypanosomes. Stumpy trypanosomes were generated by induction of expression site attenuation (ES), or SIF-treatment (SIF). MG, midgut infection; PV, proventriculus infection; SG, salivary gland infection; TI, transmission index (SG/MG); n, number of independent fly infection experiments.

(D) Dissection of an infected tsetse fly for explantation of the alimentary tract. Scale bar: 5 mm.

(E) Explanted alimentary tract of the tsetse, with the different subcompartments labelled. Scale bar: 5 mm.

(F) Scanning electron micrograph of a typical trypanosome infection of the tsetse salivary glands, with epimastigote and mammal-infective metacyclic trypanosomes. Parasites are pseudocoloured yellow. Scale bar: 1  $\mu$ m.

(G) Graphical representation of the transmission index TI (SG/MG) of slender (striped, SL) and stumpy (solid, ST) trypanosomes at different numbers per bloodmeal (data reproduced from Figure 1C). A high TI indicates successful completion of the life cycle in the tsetse vector. At low infective doses, slender trypanosomes had a higher TI compared to stumpy parasites. There was no difference between stumpy parasites generated by SIF-treatment (SIF) or expression site attenuation (ES).

## Figure 2

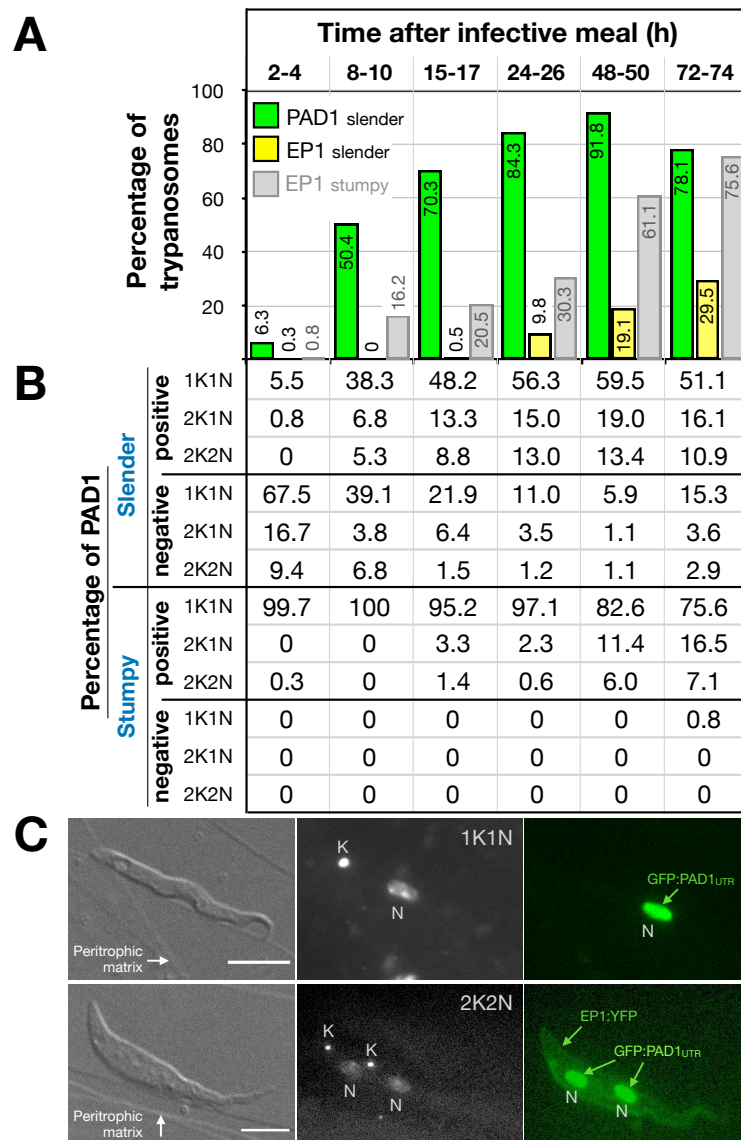

## Legend to Figure 2

Slender trypanosomes differentiate to the procyclic life cycle stage in the tsetse fly without undergoing cell cycle arrest. Tsetse flies were infected with either slender (3.6% PAD1-positive) or stumpy (100% PAD1-positive) trypanosomes. 72 (slender) or 42 (stumpy) flies were dissected (equal sex ratios) at different timepoints after infection. Experiments were done at least three times; data are presented as sample means.

(A) Living trypanosomes (>100 cells per time point) were microscopically analysed in the explants and scored for the expression of the fluorescent stumpy reporter GFP:PAD1<sub>UTR</sub> in the nucleus (green bar), and the procyclic insect stage reporter EP1:YFP on the cell surface (yellow bar). The grey bars show EP1:YFP expression in infections using stumpy cells. GFP:PAD1<sub>UTR</sub> expression in stumpy trypanosomes is not shown, because all cells were positive.

(B) Slender (n=1845) and stumpy (n=1237) trypanosomes scored as PAD1-positive or -negative in (A), were stained with DAPI, and the cell cycle position determined based on the configuration of kinetoplast (K) to nucleus (N) at the timepoints indicated.

(C) Exemplary images of procyclic trypanosomes in the tsetse explants 24h post-infection with slender cells. Morphology (DIC panels, left), cell cycle status (DAPI label, middle panels) and expression of fluorescent reporters (right) were scored. Note that the upper panels show a cell with procyclic morphology that is nonetheless EP1:YFP-negative, indicating that the EP1 signal underestimates the total numbers of procyclic cells in the population. Scale bar: 5  $\mu$ m.

## Figure 3

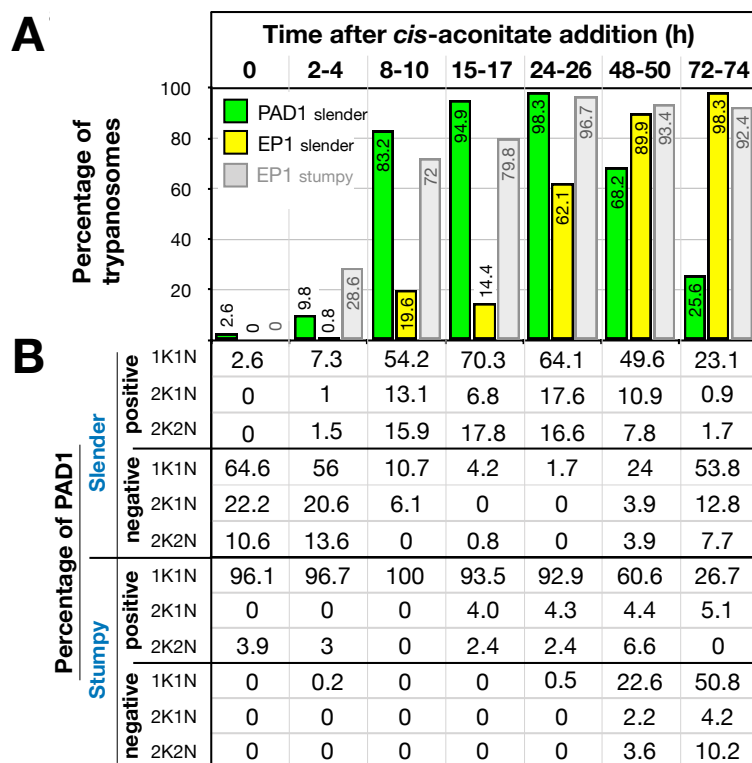

### Legend to Figure 3

Slender trypanosomes differentiate to the procyclic life cycle stage *in vitro* without cell cycle arrest. Cultured slender or stumpy trypanosomes were differentiated *in vitro* by the addition of *cis*-aconitate and temperature reduction to 27°C.

(A) At the times indicated, trypanosomes were analysed for the expression of the fluorescent reporters GFP:PAD1<sub>UTR</sub> and EP1:YFP, as in Fig. 2.

(B) Slender (n=1653) and stumpy (n=1798) trypanosomes were stained with DAPI and the configuration of the nucleus (N) and kinetoplast (K) was microscopically determined to identify the cell cycle stage. Data are compiled from five independent experiments, with each timepoint being analysed in at least two separate experiments.



## Figure 4

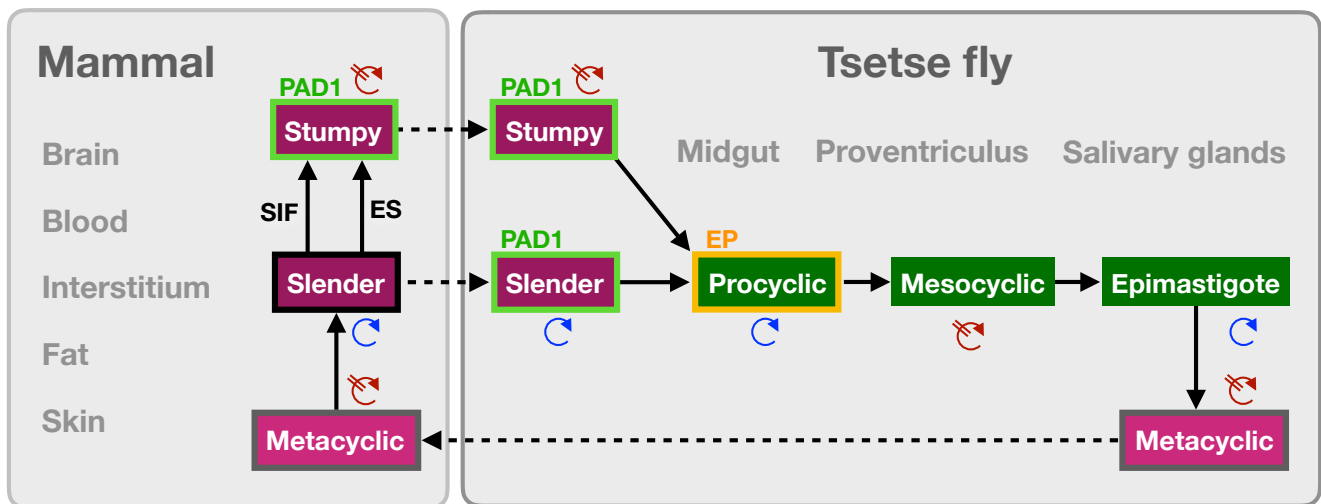

## Figure 4

A revised life cycle for the parasite *Trypanosoma brucei*. Cell-cycle-arrested metacyclic trypanosomes are injected by the tsetse fly into the mammalian host's skin. There, the parasites re-enter the cell cycle, and proliferate as slender forms in the blood, while disseminating into the interstitium and various tissues, including fat, and brain. At least two triggers (SIF or ES) launch the PAD1-dependent differentiation pathway to the cell cycle-arrested stumpy bloodstream stage. Stumpy trypanosomes can establish a fly infection when taken up with the bloodmeal of a tsetse. This work reveals that proliferating slender stage trypanosomes are equally effective for tsetse transmission, that a single parasite suffices, and that no cell cycle arrest is required for differentiation to the procyclic insect stage.

## Supplementary Table 1

| Number of trypanosomes per blood meal |                        |       |               |               | Tsetse fly infection (%) |     |     |      |                 |                  |                 |   |
|---------------------------------------|------------------------|-------|---------------|---------------|--------------------------|-----|-----|------|-----------------|------------------|-----------------|---|
|                                       | 1                      | 2     | 3             | 4             | 5                        | 6   | 7   | 8    | 9               | 10               | 11              |   |
|                                       |                        | Total | PAD1-negative | PAD1-positive | MG                       | PV  | SG  | TI   | Tsetse infected | Tsetse dissected | Sex ratio (♀/♂) | n |
| i                                     | Monomorph              | 2400  | 2395          | 5             | 11.0                     | 0.6 | 0.0 | 0.0  | 186             | 155              | 0.64            | 3 |
| ii                                    | Monomorph + GSH + cAMP | 2400  | 495           | 1905          | 25.5                     | 0.0 | 0.0 | 0.0  | 52              | 47               | 0.82            | 1 |
| iii                                   | Slender naïve          | 2     | 750           | 11            | 6.9                      | 6.3 | 2.5 | 0.36 | 165             | 159              | 1.04            | 3 |

(i, ii) Monomorphic trypanosomes do colonise the tsetse midgut, but cannot pass the proventriculus to infect the salivary glands. For infection with monomorphic parasites, cells were additionally treated for 48 hours with 12.5 mM glutathione (GSH) and 100 µM 8-pCPT-cAMP (cAMP).

(iii) Pleomorphic, naïve slender trypanosomes, freshly differentiated from metacyclic trypanosomes, readily passage through the tsetse fly.

## Supplementary Video 1

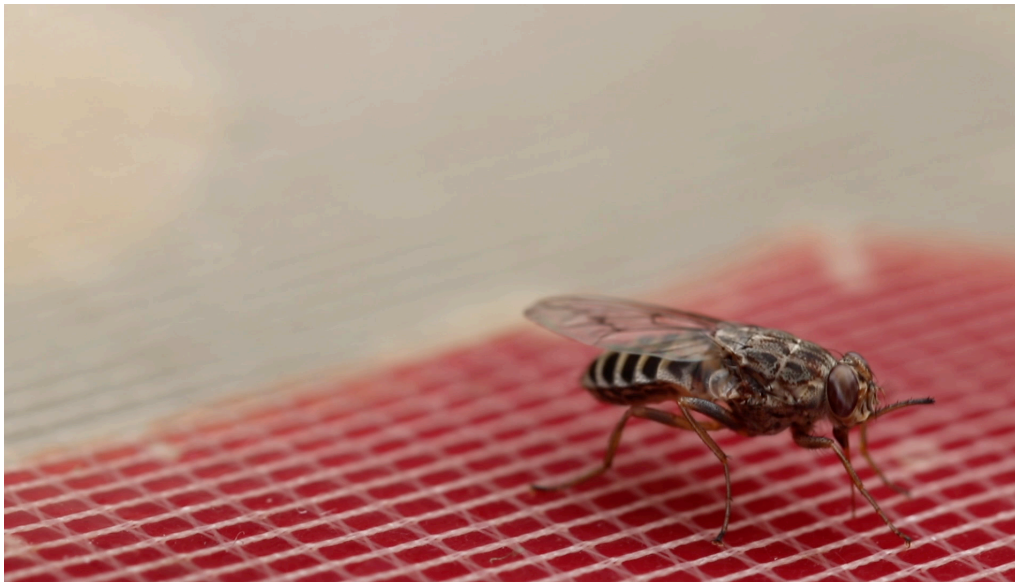

Video of a tsetse fly taking a bloodmeal through a silicon membrane.

## Supplementary Video 2

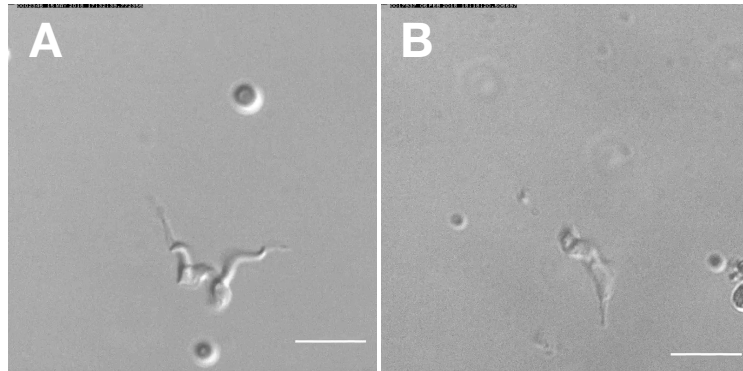

Dividing (2K2N) long slender trypanosome in the tsetse fly, 2-4 hours post infection (h.p.i). No GFP:PAD1<sub>UTR</sub> signal is detectable

Cell cycle arrested (1K1N) short stumpy trypanosome in the tsetse fly, 2-4 h p.i. The GFP:PAD1<sub>UTR</sub> reporter is expressed

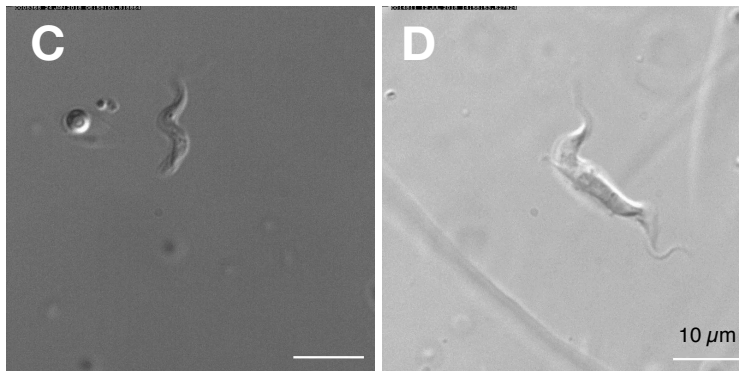

Dividing (2K1N) long slender trypanosome in the tsetse fly, 15-17 h.p.i. The GFP:PAD1<sub>UTR</sub> signal is clearly visible

Dividing (2K2N) procyclic trypanosome in the tsetse fly, 48-50 h p.i. The cell expresses both, GFP:PAD1<sub>UTR</sub> and EP1:YFP.

**After uptake by the tsetse fly, slender trypanosomes promptly launch the PAD1 pathway, without arresting in the cell cycle. All videos were recorded at 250 fps, and the cell cycle position is indicated by DAPI staining.**
